# Supplementary material
Source: Research Square preprint supplement (doi:10.21203/rs.3.rs-9637201/v1)
Supplement: Supplementary file 1 [file 0b94ae3d0b0431c2f996d2ed.xlsx]

## Sheet: Appendix 1
Economic dataset
Ingredient		Merck		Alibaba		Others
Name	Formula	Code	Cost per g (MXP)	Link	Cost per gram (USD)	Link	Cost per gram (USD)
Sodium nitrate	NaNO3	S5506	2.329			https://apcpure.com/product/sodium-nitrate-98-0-99-5/	0.008678
Magnesium sulphate heptahydrate	MgSO4 · 7H2O	230391	0.89112	https://www.alibaba.com/product-detail/Sale-Price-Fertilizer-Use-MgSO4-7H2O_1600291265692.html?spm=a2700.galleryofferlist.p_offer.d_title.476026705gpfHO&s=p	0.000105
Calcium chloride dihydrate	CaCl2 · 2H2O	223506	1.08117	https://www.alibaba.com/product-detail/Good-Quality-Calcium-Chloride-Dihydrate-Powder_1600715972061.html?spm=a2700.galleryofferlist.p_offer.d_title.552b64a62oPd3K&s=p	0.02
Citric acid	C6H8O7	W230618	0.28316	https://www.alibaba.com/product-detail/Wholesale-citric-acid-anhydrous-food-grade_1600737138236.html?spm=a2700.galleryofferlist.normal_offer.d_title.52c3505dqHlfYa	0.00065
Ferric ammonium citrate	(NH4)5[Fe(C6H4O7)2]	RES20400-A7	5.3846	https://www.alibaba.com/product-detail/B-C-I-SUPPLY-Food-Grade_1600574597009.html?spm=a2700.galleryofferlist.p_offer.d_title.2c8363572v1TzY&s=p	0.025
EDTA (disodium salt)	C10H16N2O8	ED2SS	3.4642	https://www.alibaba.com/product-detail/EDTA-2Na-Ethylenediaminetetraacetic-Acid-Disodium-Salt_1600291064828.html?spm=a2700.galleryofferlist.p_offer.d_title.7bb96ad2Mcq6Ei&s=p	0.0025
Na-EDTA		ED2SS	3.4642	https://www.alibaba.com/product-detail/EDTA-2Na-Ethylenediaminetetraacetic-Acid-Disodium-Salt_1600291064828.html?spm=a2700.galleryofferlist.p_offer.d_title.7bb96ad2Mcq6Ei&s=p	0.0025
Na-EDTA · 2H2O		ED2SS	3.4642	https://www.alibaba.com/product-detail/Hot-Selling-EDTA-Disodium-Salt-Dihydrate_1600614838727.html?spm=a2700.galleryofferlist.p_offer.d_title.463660c3WbU2nJ&s=p	0.0025
Fe-EDTA		03650	5.142	https://www.alibaba.com/product-detail/EDTA-Ferric-Sodium-Salt-EDTA-Fe_1600954834025.html?spm=a2700.galleryofferlist.p_offer.d_title.59b9950fuOaxQf&s=p	0.00275
FeNa-EDTA		03650	5.142	https://www.alibaba.com/product-detail/EDTA-Ferric-Sodium-Salt-EDTA-Fe_1600954834025.html?spm=a2700.galleryofferlist.p_offer.d_title.59b9950fuOaxQf&s=p	0.00275
Mg-EDTA		317810	20.624	https://www.alibaba.com/product-detail/EDTA-magnesium-Disodium-EDTA-Mg-CAS_1600362071985.html?spm=a2700.galleryofferlist.p_offer.d_title.39995e58mKJQ8w&s=p	0.0075
Perboric acid	H3BO4	B6768	1.3252	https://www.alibaba.com/product-detail/Factory-Directly-supply-Wholesale-Price-High_1600935927223.html?spm=a2700.galleryofferlist.normal_offer.d_title.394e67fdwFCMVW	0.00085
Copper sulfate pentahydrate	CuSO4 · 5H2O	209198	0.91908	https://www.alibaba.com/product-detail/Wholesale-Copper-Sulfate-Pentahydrate-99-Copper_1600545676252.html?spm=a2700.galleryofferlist.p_offer.d_title.7212125a4jgQPh&s=p	0.325
Sodium molybdate dihydrate	Na2MoO4 · 2H2O	M1003	7.85	https://www.alibaba.com/product-detail/99-Sodium-Molybdate-Dihydrate_60775309409.html?spm=a2700.galleryofferlist.p_offer.d_title.7d6a33a1V2AmWJ&s=p	0.007
Calcium phosphate	Ca3(PO4)2	900205	116.38	https://www.alibaba.com/product-detail/High-Purity-CAS-7758-87-4_10000009040567.html?spm=a2700.galleryofferlist.p_offer.d_title.2edb262dxHzu6E&s=p	0.008
Vitamin B12	C₆₃H₈₈CoN₁₄O₁₄P	V2876	2.07752	https://www.alibaba.com/product-detail/TianJia-High-Purity-Vitamin-B12-Supplements_1600083929031.html?spm=a2700.galleryofferlist.p_offer.d_title.24c4189eUXIiKL&s=p	0.011
HEPES	C8H18N2O4S	PHG0001	5.73296	https://www.alibaba.com/product-detail/Hepes-Hepeshepes-China-Manufacturer-HEPES-CAS_1600937362839.html?spm=a2700.galleryofferlist.p_offer.d_title.6ad221748pozup&s=p	0.0965
Dipotassium h phosphate	K2HPO4	P3786	2.9888	https://www.alibaba.com/product-detail/K2hpo4-K2hpo4k2hpo4-Low-Price-Easily-Soluble_1600915007343.html?spm=a2700.galleryofferlist.p_offer.d_title.364f18b0xMTnqt&s=p	0.0012
Potassium dihydrogen phosphate	KH2PO4	P5379	1.4579	https://www.alibaba.com/product-detail/Kh2po4-Kh2po4-China-Factory-Supply-High_1600919150577.html?spm=a2700.galleryofferlist.topad_classic.d_title.5ed53c21aEC5W9	0.0011
Magnesium sulphate	MgSO4	208094	0.9865	https://www.alibaba.com/product-detail/MgSO4-Magnesium-Sulphate-Bath-Salt-Anhydrous_1600874176255.html?spm=a2700.galleryofferlist.topad_classic.d_title.76112e15OmMPrI	8.8e-05
Calcium chloride	CaCl2	C4901	3.266	https://www.alibaba.com/product-detail/Industry-grade-raw-material-94-cacl2_1600983168339.html?spm=a2700.galleryofferlist.p_offer.d_title.15fb270fcI1NHy&s=p	0.000225
Sodium bicarbonate	NaHCO3	S6014	0.23562	https://www.alibaba.com/product-detail/Sodium-bicarbonate-food-grade-Sodium-hydrogen_1600838082636.html?spm=a2700.galleryofferlist.p_offer.d_title.42553c16XfrzwU&s=p	0.0002
Sodium acetate	C2H3NaO2 / NaOAc	W302406	0.44412	https://www.alibaba.com/product-detail/Sodium-Acetate-Anhydrous-CAS-127-09_1600774622155.html?spm=a2700.galleryofferlist.topad_classic.d_title.270cac27SOiujg	0.0007
Sodium carbonate	Na2CO3	222321	0.75724	https://www.alibaba.com/product-detail/Soda-Manufacturers-Sodium-Carbonate-Anhydrous-na2co3_1600746411272.html?spm=a2700.galleryofferlist.topad_classic.d_title.783a47031FKlEZ	0.00025
Ferrous sulfate dihydrate	FeSO4 · 2H2O
Muriate of potash (MOP)				https://www.alibaba.com/product-detail/POTASSIUM-CHLORIDE-MURIATE-OF-POTASH-MOP_11000007655354.html?spm=a2700.galleryofferlist.normal_offer.d_title.d78245b9TyImRG	0.00018
Potassium sulfate	K2SO4	P0772	2.19	https://www.alibaba.com/product-detail/High-Quality-Factory-Price-Potassium-Sulfate_1600945485524.html?spm=a2700.galleryofferlist.p_offer.d_title.3af457d0IKGAmZ&s=p	0.000565
Sodium chloride	NaCl	S9888	0.2934	https://www.alibaba.com/product-detail/Direct-Suppliers-From-China-Purity-99_1600923466787.html?spm=a2700.galleryofferlist.p_offer.d_title.4ad26f2chJ1Wzs&s=p	0.00011
Ferrous sulfate / Iron II sulfate	FeSO4			https://www.alibaba.com/product-detail/Ferrous-Sulfate-Feso4-Chemical-Formula-Iron_1600965868957.html?spm=a2700.galleryofferlist.p_offer.d_title.447e64954cbNyO&s=p	0.00018
Boric Acid	H3BO3	B0394	1.092	https://www.alibaba.com/product-detail/Cas-11113-50-1-Boric-Acid_1600915453682.html?spm=a2700.galleryofferlist.p_offer.d_title.3f175edcht11un&s=p	0.0085
Manganese chloride tetrahydrate	MnCl2 · 4H2O	M3634	5.232			https://www.made-in-china.com/video-channel/samreal_BstEeDvOGFVX_Manganese-Chloride-Tetrahydrate-CAS-13446-34-9-Mncl2-4-H2O-.html?acc=8642081837-lxy&cpn=20797098137-157334412433&tgt=dsa-2172470005862&net=g&dev=c-&gid=CjwKCAiA1fqrBhA1EiwAMU5m_0eyRZSpaaUtwhVUh3Mx08GbEKxTTHN9WNC9AxQgbJp-F7wof3GnZBoCM2wQAvD_BwE&kwd=&mtp=&loc=9073927-&gad_source=1&gclid=CjwKCAiA1fqrBhA1EiwAMU5m_0eyRZSpaaUtwhVUh3Mx08Gb…	0.002
Zinc sulphate heptahydrate	ZnSO4 · 7H2O	Z4750	2.8152	https://www.alibaba.com/product-detail/Zn-22-Percent-ZnSO4-7H2O-Zinc_529616644.html?spm=a2700.galleryofferlist.topad_classic.d_title.f91d5dd9a18EiO	0.000525
Sodium molybdate hydrate	Na2MoO4 · H2O
d-xylose	C5H10O5	W360600	1.0391	https://www.alibaba.com/product-detail/Xylose-D-xylose-Food-Grade-Additive_1600976796962.html?spm=a2700.galleryofferlist.p_offer.d_title.393b1a12ihJWqT&s=p	0.01
l-arabinose	C5H10O5	W325501	15.202	https://www.alibaba.com/product-detail/99-L-Arabinose-Arabinose-CAS-5328_1600450700811.html?spm=a2700.galleryofferlist.p_offer.d_title.76ee1f2bJDcP2u&s=p	0.0065
Ferrous sulfate heptahydrate	FeSO4 · 7H2O	F7002	2.622	https://www.alibaba.com/product-detail/JRZ-Factory-Outlet-FeSO4-7H2O-Ferrous_60304850269.html?spm=a2700.galleryofferlist.p_offer.d_title.5bfb6f7aCrfNz7&s=p	0.000115
Molybdenum trioxide	MoO3	M0753	16.088	https://www.alibaba.com/product-detail/Molybdenum-Trioxide-MoO3-Powder-CAS-1313_1600671242161.html?spm=a2700.galleryofferlist.topad_classic.d_title.7a267771RVjB52	0.025
Cobalt nitrate hexahydrate	Co(NO3)2 · 6H2O	230375	11.312	https://spanish.alibaba.com/p-detail/99+-1600898758401.html?spm=a2700.galleryofferlist.p_offer.d_title.582c2706FYBO3N&s=p	0.0095
Potassium hypophosphite	KH2PO2
Sodium molybdate	Na2MoO4	243655	19.374	https://www.alibaba.com/product-detail/Wholesale-Price-Sodium-Molybdate-Industrial-Grade_1600629790532.html?spm=a2700.galleryofferlist.p_offer.d_title.4ba87c9a0vHtyY&s=p	0.0165
Magnesium chloride	MgCl2	M8266	8.518	https://www.alibaba.com/product-detail/Top-Quality-Magnesium-Chloride-Feed-Grade_1600729884823.html?spm=a2700.galleryofferlist.p_offer.d_title.6b3b6f68K170Ff&s=p	0.0375
Copper (ll) sulfate	CuSO4	12852	5.245	https://www.alibaba.com/product-detail/Cuso4-China-Volksky-Chemical-Materials-Supplier_1600567863027.html?spm=a2700.galleryofferlist.p_offer.d_title.76ff1effBapaBr&s=p	0.00633
Zinc sulfate	ZnSO4			https://www.alibaba.com/product-detail/Zinc-Sulphate-Of-Chemical-Raw-Materials_1600940059959.html?spm=a2700.galleryofferlist.p_offer.d_title.23cd2eefuMCR5N&s=p	0.0001595
Potassium nitrate	KNO3			https://www.alibaba.com/product-detail/White-crystal-Food-additive-kno3-pure_10000013583034.html?spm=a2700.galleryofferlist.p_offer.d_title.4208d21f5FULZ3&s=p	0.000925	https://www.lmine.com/nitratesbases-c-1_7_221/potassium-nitrate-prills-technical-grade-kno3-55-lb-bag-p-4560.html	0.00472884
Manganese sulfate monohydrate	MnSO4 · H2O	M7634	2.519	https://www.alibaba.com/product-detail/Manganese-Sulfate-Suppliers-Manganese-Sulfate-Monohydrate_60854403231.html?spm=a2700.galleryofferlist.p_offer.d_title.76ea511eSMYQhW&s=p	0.000475
Cobaltous sulfate heptahydrate	CoSO4 · 7H2O	C6768	4.6096			https://camachem.com/en/cobalt-sulfate-heptahydrate.html	0.0001
Copper sulfate heptahydrate	CuSO4 · 7H2O
Glucose		G8270	0.28988	https://www.alibaba.com/product-detail/Hot-Sale-Food-Sweetener-Dextrose-Anhydrous_1600941485248.html?spm=a2700.galleryofferlist.p_offer.d_title.4c0f2ef8Masc8z&s=p	2.75e-05
Valerate (valeric acid)		W310107	0.45012	https://spanish.alibaba.com/p-detail/Valeriana-1600699043541.html?spm=a2700.galleryofferlist.p_offer.d_title.7ad52b1cbfDdPK&s=p	0.0215
Sucrose		S9378	0.9639	https://www.alibaba.com/product-detail/Sucrosesucrosesucrosesucrosesucrose-Good-Price-Manufacturer-Price-White_11000008741978.html?spm=a2700.galleryofferlist.p_offer.d_title.163e437b2TutZG&s=p	0.001
Fructose		F3510	1.2952	https://www.alibaba.com/product-detail/Fructose-Fructose-Fructose-Powder-Food-Grade_1600969428388.html?spm=a2700.galleryofferlist.p_offer.d_title.757a5bb306RLRx&s=p	6.8e-05
Magnesium dichloride hexahydrate	MgCl2 · 6H2O	M9272	1.34042	https://www.alibaba.com/product-detail/Mgcl2-6H2O-46-Magnesium-Chloride-Hexahydrate_1600980475790.html?spm=a2700.galleryofferlist.topad_classic.d_title.25adc3d5ZwhcJ7	0.000135
Dipotassium hydrogen phosphate trihydrate	K2HPO4 · 3H2O	P5504	2.7711
Potassium chloride	KCl	P3911	1.36058	https://www.alibaba.com/product-detail/TianJia-Food-Additive-Manufacturer-CAS7447-40_1600955280704.html?spm=a2700.galleryofferlist.p_offer.d_title.2d471e9f5exLv3&s=p	0.00112
Cobalt (ll) chloride hexahydrate	CoCl2 · 6H2O	202185	6.033	https://www.alibaba.com/product-detail/Hot-sale-high-purity-Industrial-grade_648113588.html?spm=a2700.galleryofferlist.normal_offer.d_title.6614b97dSfvNf4	0.0135
Copper (ll) sulfate pentahydrate	CuSO4 · 5H2O	209198	0.91908	https://www.alibaba.com/product-detail/High-Quality-Blue-Crystal-Copper-II_1600869691800.html?spm=a2700.galleryofferlist.p_offer.d_title.38cc2c8bOUTMu0&s=p	0.00178667
Ammonium sulfate	(NH4)2SO4	A4915	0.46464	https://www.alibaba.com/product-detail/High-Purity-And-Quantity-Cas-7783_1600966021650.html?spm=a2700.galleryofferlist.p_offer.d_title.25c57c7dFfUJMA&s=p	0.0001425
Distilled water
Deionized water		38796	645*
Iron (lll) chloride	FeCl3	157740	1.084	https://spanish.alibaba.com/p-detail/Factory-1600935914327.html?spm=a2700.galleryofferlist.p_offer.d_title.2ef45e7cYudotg&s=p	0.0016
*Denotes cost per L (MXP)

## Sheet: Appendix 2
Culture media composition per methodology
Species	Culture media composition	Reference
1. Synechococcus subsalsus	40 mg/L K2HPO4 (Dipotassium h phosphate), 75 mg/L MgSO4 (Magnesium sulphate), 35 mg/L CaCl2 (Calcium chloride), 6 mg/L (NH4)5[Fe(C6H4O7)2] (Ferric ammonium citrate), 1 mg/L C10H16N2O8 (EDTA), 20 g/L Na2CO3 (Sodium carbonate), 6 mg/L C6H8O7 (Citric Acid), 0.45 g/L NaNO3 (Sodium nitrate), 0.4 g/L NaHCO3 (Sodium bicarbonate), 1 L (Distilled Water)	(Costa et al, 2018)
2. Synechococcus elongates (1)	25 g/L NaCl (Sodium chloride), 3.5 g/L MgSO4 · 7H2O (Magnesium sulphate heptahydrate), 2 g/L MgCl2 · 6H2O (Magnesium dichloride hexahydrate), 0.75 g/L NaNO3 (Sodium nitrate), 0.75 g/L K2HPO4 · 3H2O (Dipotassium hydrogen phosphate trihydrate), 0.5 g/L CaCl2 · 2H2O (Calcium chloride dihydrate), 0.5 g/L KCl (Potassium chloride), 0.003 g/L C6H8O7 (Citric acid), 0.003 g/L (NH4)5[Fe(C6H4O7)2] (Ferric a…	(Mendhulkar et al, 2017)
3. Synechococcus elongates (2)	25 g/L NaCl (Sodium chloride), 3.5 g/L MgSO4 · 7H2O (Magnesium sulphate heptahydrate), 2 g/L MgCl2 · 6H2O (Magnesium dichloride hexahydrate), 0.75 g/L NaNO3 (Sodium nitrate), 0.02 g/L NaCO3 (Sodium carbonate), 0.5 g/L CaCl2 · 2H2O (Calcium chloride dihydrate), 0.5 g/L KCl (Potassium chloride), 0.003 g/L C6H8O7 (Citric acid), 0.003 g/L (NH4)5[Fe(C6H4O7)2] (Ferric ammonium citrate), 0.0005 g/L (Mg-…	(Mendhulkar et al, 2017)
4. Synechocystis salina	2.27 g/L K2HPO4 (Dipotassium h phosphate), 0.95 g/L KH2PO4 (Potassium dih phosphate), 0.67 g/L (NH4)2SO4 (Ammonium sulfate), 2 mL (Metals solution), 1 L (Deionized water). (Metals solution: 6.37 g/L (Na-EDTA · 2H2O), 1 g/L ZnSO4 · 7H2O (Zinc sulphate heptahydrate), 0.5 g/L CaCl2 · 2H2O (Calcium chloride dihydrate), 2.5 g/L FeSO4· 7H2O (Ferrous sulfate heptahydrate), 0.1 g/L Na2MoO4 · 2H2O (Sodium…	(Kovalcik et al, 2017)
5. Spirulina platensis UMACC 161	Cantidad Formula (Reactivo ), 9 g/L NaHCO3 (Sodium bicarbonate), 0.25 g/L K2HPO4 (Dipotassium h phosphate), 1.25 g/L NaNO3 (Sodium nitrate), 0.5 g/L K2SO4 (Potassium sulfate), 0.5 g/L MgSO4 · 7H2O (Magnesium sulphate heptahydrate), 0.1 g/L CaCl2 (Calcium chloride), 0.005 g/L FeSO4 · 2H2O (Ferrous sulfate dihydrate*), 0.5 mL (Micronutrient), 1 L (Distilled water). (Micronutrients: 2.86 g/L H3BO3 (…	(Toh et al, 2008)
6. Spirulina sp. LEB 18 (2)	16.8 g/L NaHCO3 (Sodium bicarbonate), 0.5 g/L K2HPO4 (Dipotassium h phosphate), 0.75 g/L NaNO3 (Sodium nitrate), 1 g/L K2SO4 (Potassium sulfate), 1 g/L NaCl (Sodium chloride), 0.2 g/L MgSO4 (Magnesium sulphate), 0.04 g/L CaCl2 (Calcium chloride), 0.01 g/L FeSO4 (Ferrous sulfate ), 0.08 g/L (Na-EDTA), 2.86 g/L H3BO3 (Boric acid), 1.81 g/L MnCl2 · 4H2O (Manganese chloride tetrahydrate), 0.222 g/L Z…	(Costa et al, 2018)
7. Scenedesmus sp. UTEX 1589	1.5 g/L NaNO3 (Sodium nitrate), 0.5 g/L NaCl (Sodium chloride), 0.075 g/L MgSO4 · 7H2O (Magnesium sulphate heptahydrate), 0.36 g/L CaCl2 · 2H2O (Calcium chloride dihydrate), 0.006 g/L C6H8O7 (Citric Acid), 0.006 g/L (NH4)5[Fe(C6H4O7)2] (Ferric ammonium citrate ), 0.001 g/L C10H16N2O8 (EDTA), 4 g/L (Glucosa), 1 mL (Trace metal mix), 1 L (Distilled water)	(García et al, 2021)
8- Nostoc muscorum Agardh	1.5 g/L NaNO3 (Sodium nitrate), 0.04 g/L K2HPO4 (Dipotassium h phosphate), 0.075 g/L MgSO4 · 7H2O (Magnesium sulphate heptahydrate), 0.36 g/L CaCl2 · 2H2O (Calcium chloride dihydrate), 0.006 g/L C6H8O7 (Citric Acid), 0.006 g/L (NH4)5[Fe(C6H4O7)2] (Ferric ammonium citrate ), 0.001 g/L C10H16N2O8 (EDTA), 0.02 g/L Na2CO3 (Sodium carbonate), 1 mL (Trace metal mix), 0.008 g/L (Acetate), 0.008 g/L (Val…	(Bhati et al, 2015)
9. Synechococcus sp. MA19	1.5 g/L NaNO3 (Sodium nitrate), 75 mg/L MgSO4 · 7H2O (Magnesium sulphate heptahydrate), 35 mg/L CaCl2 · 2H2O (Calcium chloride dihydrate), 6 mg/L C6H8O7 (Citric Acid), 6 mg/L (NH4)5[Fe(C6H4O7)2] (Ferric ammonium citrate ), 1 mg/L C10H16N2O8 (EDTA), 1 mg/L Na2CO3 (Sodium carbonate), 2.86 mg/L H3BO4 (Perboric acid), 0.222 mg/L CuSO4 · 5H2O (Copper sulfate pentahydrate), 0.021 mg/L Na2MoO4 · 2H2O (S…	(Nishioka et al, 2001)
10. Synechocystis sp.	1.5 g/L NaNO3 (Sodium nitrate), 0.04 g/L K2HPO4 (Dipotassium h phosphate), 0.075 g/L MgSO4 · 7H2O (Magnesium sulphate heptahydrate), 0.36 g/L CaCl2 · 2H2O (Calcium chloride dihydrate), 0.006 g/L C6H8O7 (Citric Acid), 0.006 g/L (NH4)5[Fe(C6H4O7)2] (Ferric ammonium citrate ), 0.001 g/L C10H16N2O8 (EDTA), 0.02 g/L Na2CO3 (Sodium carbonate), 1 mL (Trace metal mix), 0.008 g/L C2H3NaO2 / NaOAc (Sodium …	(Panda et al, 2006)
11. Spirulina sp. LEB 18 (1.1)	4.4 g/L NaHCO3 (Sodium bicarbonate), 0.5 g/L K2HPO4 (Dipotassium h phosphate), 0.25 g/L NaNO3 (Sodium nitrate), 1 g/L K2SO4 (Potassium sulfate), 1 g/L NaCl (Sodium chloride), 0.2 g/L MgSO4 (Magnesium sulphate), 0.04 g/L CaCl2 (Calcium chloride), 0.01 g/L FeSO4 (Ferrous sulfate ), 0.08 g/L (Na-EDTA), 2.86 g/L H3BO3 (Boric acid), 1.81 g/L MnCl2 · 4H2O (Manganese chloride tetrahydrate), 0.222 g/L Zn…	(Coelho et al, 2015)
12. Spirulina sp. LEB 18 (1.2)	8.4 g/L NaHCO3 (Sodium bicarbonate), 0.5 g/L K2HPO4 (Dipotassium h phosphate), 2.5 g/L NaNO3 (Sodium nitrate)	(Coelho et al, 2015)
13. Chlorella fusca LEB 111	0.75 g/L NaNO3 (Sodium nitrate), 0.04 g/L K2HPO4 (Dipotassium h phosphate), 0.075 g/L MgSO4 · 7H2O (Magnesium sulphate heptahydrate), 0.36 g/L CaCl2 · 2H2O (Calcium chloride dihydrate), 0.006 g/L C6H8O7 (Citric Acid), 0.006 g/L (NH4)5[Fe(C6H4O7)2] (Ferric ammonium citrate ), 0.001 g/L C10H16N2O8 (EDTA), 0.02 g/L (d-xylose), 0.02 g/L (l-arabinose), 1 mL (Trace metal mix), 1 L (Distilled water)	(Cassuriaga et al, 2018)
14. Stigeoclonium sp. B23	1.5 g/L NaNO3 (Sodium nitrate), 0.04 g/L K2HPO4 (Dipotassium h phosphate), 0.075 g/L MgSO4 · 7H2O (Magnesium sulphate heptahydrate), 0.36 g/L CaCl2 · 2H2O (Calcium chloride dihydrate), 0.006 g/L C6H8O7 (Citric Acid), 0.006 g/L (NH4)5[Fe(C6H4O7)2] (Ferric ammonium citrate ), 0.001 g/L C10H16N2O8 (EDTA), 0.02 g/L Na2CO3 (Sodium carbonate), 1 mL (Trace metal mix), 0.82 g/L C2H3NaO2 / NaOAc (Sodium a…	(Mourão et al, 2020)
15. Desmodesmus communis	0.6 g/L KNO3 (Potassium nitrate), 0.1 g/L MgSO4 · 7H2O (Magnesium sulphate heptahydrate), 0.054 g/L CaCl2 · 2H2O (Calcium chloride dihydrate), 0.01 g/L (FeNaEDTA), 0.00236 g/L H3BO3 (Boric acid), 0.00154 g/L MnSO4 · H2O (Manganese sulfate monohydrate), 0.00022 g/L ZnSO4 · 7H2O (Zinc sulphate heptahydrate), 0.00009 g/L CoSO4 · 7H2O (Cobaltous sulfate heptahydrate), 0.00008 g/L CuSO4 · 7H2O (*Coppe…	(Pezzolesi et al, 2023)
