# Supplementary material
Source: Research Square preprint supplement (doi:10.21203/rs.3.rs-9637201/v1)
Supplement: Supplementary file 1 [file a7562822f525db8be3ea7751.docx]

**Table 6**. Multiple linear regressions (MLRs) for the global robustness analysis simulation of Cost/kg (USD/kg) and their respective parameter impact analysis on Cost/kg for low-cost supplier strategies. Equations are in the form of , where the response variable, , is equal to Cost/kg; to are the regression coefficients for each of the included parameters, which are the terms shown as to . Unshown terms indicate an insignificant parameter impact on the response variable (Cost/kg).

| **Methodology** | **Production titer (X1)** | **Downstream cost contribution (X2)** | **Capital cost (X3)** | **Market size (X4)** | **Recovery yield (X5)** | **Linear Equation** |
| --- | --- | --- | --- | --- | --- | --- |
| *Spirulina platensis* UMACC 161 (Methodology 5) | Yes | No | Yes | Yes | Yes |  |
| *Nostoc muscorum* Agardh(Methodology 8) | Yes | Yes | Yes | Yes | Yes |  |
| *Synechococcus* sp. MA19 (Methodology 9) | Yes | Yes | No | Yes | Yes |  |
