# Supplementary material
Source: Research Square preprint supplement (doi:10.21203/rs.3.rs-9637201/v1)
Supplement: Supplementary file 2 [file eb002a614b96a83e99e70477.docx]

**Monte Carlo simulation code (Visual Basic) used to generate 300 random parameter values within their respective variation ranges, iterated through a loop for each PHA methodology.**

Sub Variar_parametros()

Dim x As Integer

Dim i As Integer

Dim Desviacion As Double

Dim Materiales As Double

Dim MediaMat As Double

Dim Capital As Double

Dim Mercado As Double

Dim Tiempo As Double

Dim ColumnaActual As Integer

Dim Organismo_tabla As String

Dim i_organismo As Integer

Dim i_renglon As Integer

Dim CostoSigma As Double

Dim CostoAlibaba As Double

Dim ColumnaMatriz As Integer

x = Cells(5, 1).Value

ColumnaActual = 1

i_organismo = 1

i_renglon = 1

For i_organismo = 1 To 15

Do

Cells(2, 3).Value = i_organismo

Range("D2").Value = WorksheetFunction.XLookup(Range("C2").Value, Sheets("Investigación de producción").Range("O33:O47"), Sheets("Investigación de producción").Range("P33:P47"))

Sheets("CostosMC").Cells(1, ColumnaActual) = Range("D2").Value

Range("D3").Value = Sheets("Investigación de producción").Cells(32 + i_organismo, 22) * -1

Range("D5").Value = Sheets("Investigación de producción").Cells(32 + i_organismo, 22)

Organismo_tabla = Range("D2").Value

‘Sheets("Valores MC").Cells(1, ColumnaActual) = Organismo_tabla

Sheets("CostosMC").Cells(1, ColumnaActual) = Organismo_tabla

For i = 1 To x

Do

Do

Randomize

Y = Rnd()

Cells(7 + i, 1).Value = Y

If Y <= Cells(6, 4) Then

'Desviación = Minimum + (maximum - minimum)*(y*standard)^(1/2)

Desviacion = Cells(3, 4) + (Cells(5, 4) - Cells(3, 4)) * (Y * Cells(6, 4)) ^ (1 / 2)

Else

'Desviación = minimum + (maximum - minimum)*(1-((1-standard)*(1-y))^(1/2))

Desviacion = Cells(3, 4) + (Cells(5, 4) - Cells(3, 4)) * (1 - ((1 - Cells(6, 4)) * (1 - Y)) ^ (1 / 2))

End If

Loop Until Sheets("Investigación de producción").Cells(32 + i_organismo, 17) + Desviacion > 0

Cells(7 + i, 2).Value = Desviacion

‘Sheets("Valores MC").Cells(2, ColumnaActual) = "Desviación Estándar"

Sheets("CostosMC").Cells(2, ColumnaActual) = "Desviación Estándar"

‘Sheets("Valores MC").Cells(2 + i, ColumnaActual).Value = Desviacion

Sheets("CostosMC").Cells(2 + i, ColumnaActual).Value = Desviacion

Randomize

Y = Rnd()

Cells(7 + i, 1).Value = Y

If Y <= Cells(6, 7) Then

'Materiales = Minimum + (maximum - minimum)*(y*standard)^(1/2)

Materiales = Cells(3, 7) + (Cells(5, 7) - Cells(3, 7)) * (Y * Cells(6, 7)) ^ (1 / 2)

Else

'Materiales = minimum + (maximum - minimum)*(1-((1-standard)*(1-y))^(1/2))

Materiales = Cells(3, 7) + (Cells(5, 7) - Cells(3, 7)) * (1 - ((1 - Cells(6, 7)) * (1 - Y)) ^ (1 / 2))

End If

'Generar lista de valores random para Materiales

Cells(7 + i, 5).Value = Materiales

‘Sheets("Valores MC").Cells(2, ColumnaActual + 1) = "Materiales"

Sheets("CostosMC").Cells(2, ColumnaActual + 1) = "Materiales"

‘Sheets("Valores MC").Cells(2 + i, ColumnaActual + 1) = Materiales

Sheets("CostosMC").Cells(2 + i, ColumnaActual + 1) = Materiales

Randomize

Y = Rnd()

Cells(7 + i, 1).Value = Y

If Y <= Cells(6, 10) Then

'Capital = Minimum + (maximum - minimum)*(y*standard)^(1/2)

Capital = Cells(3, 10) + (Cells(5, 10) - Cells(3, 10)) * (Y * Cells(6, 10)) ^ (1 / 2)

Else

'Capital = minimum + (maximum - minimum)*(1-((1-standard)*(1-y))^(1/2))

Capital = Cells(3, 10) + (Cells(5, 10) - Cells(3, 10)) * (1 - ((1 - Cells(6, 10)) * (1 - Y)) ^ (1 / 2))

End If

Cells(7 + i, 8).Value = Capital

‘Sheets("Valores MC").Cells(2, ColumnaActual + 2) = "Capital"

Sheets("CostosMC").Cells(2, ColumnaActual + 2) = "Capital"

‘Sheets("Valores MC").Cells(2 + i, ColumnaActual + 2).Value = Capital

Sheets("CostosMC").Cells(2 + i, ColumnaActual + 2).Value = Capital

Randomize

Y = Rnd()

Cells(7 + i, 1).Value = Y

If Y <= Cells(6, 13) Then

'Mercado = Minimum + (maximum - minimum)*(y*standard)^(1/2)

Mercado = Cells(3, 13) + (Cells(5, 13) - Cells(3, 13)) * (Y * Cells(6, 13)) ^ (1 / 2)

Else

'Mercado = minimum + (maximum - minimum)*(1-((1-standard)*(1-y))^(1/2))

Mercado = Cells(3, 13) + (Cells(5, 13) - Cells(3, 13)) * (1 - ((1 - Cells(6, 13)) * (1 - Y)) ^ (1 / 2))

End If

Cells(7 + i, 11).Value = Mercado

‘Sheets("Valores MC").Cells(2, ColumnaActual + 3) = "Mercado"

Sheets("CostosMC").Cells(2, ColumnaActual + 3) = "Mercado"

‘Sheets("Valores MC").Cells(2 + i, ColumnaActual + 3).Value = Mercado

Sheets("CostosMC").Cells(2 + i, ColumnaActual + 3).Value = Mercado

Randomize

Y = Rnd()

Cells(7 + i, 1).Value = Y

If Y <= Cells(6, 16) Then

'Tiempo = Minimum + (maximum - minimum)*(y*standard)^(1/2)

Tiempo = Cells(3, 16) + (Cells(5, 16) - Cells(3, 16)) * (Y * Cells(6, 16)) ^ (1 / 2)

Else

'Tiempo = minimum + (maximum - minimum)*(1-((1-standard)*(1-y))^(1/2))

Tiempo = Cells(3, 16) + (Cells(5, 16) - Cells(3, 16)) * (1 - ((1 - Cells(6, 16)) * (1 - Y)) ^ (1 / 2))

End If

Cells(7 + i, 14).Value = Tiempo

‘Sheets("Valores MC").Cells(2, ColumnaActual + 4) = "Tiempo de Fermentación"

Sheets("CostosMC").Cells(2, ColumnaActual + 4) = "Tiempo de Fermentación"

‘Sheets("Valores MC").Cells(2 + i, ColumnaActual + 4).Value = Tiempo

Sheets("CostosMC").Cells(2 + i, ColumnaActual + 4).Value = Tiempo

ColumnaMatriz = 1

Sheets("Multiplicador de parámetros").Cells(1 + i_organismo, 2 + ColumnaMatriz) = Desviacion

ColumnaMatriz = ColumnaMatriz + 1

Sheets("Multiplicador de parámetros").Cells(1 + i_organismo, 2 + ColumnaMatriz) = Materiales

ColumnaMatriz = ColumnaMatriz + 1

Sheets("Multiplicador de parámetros").Cells(1 + i_organismo, 2 + ColumnaMatriz) = Capital

ColumnaMatriz = ColumnaMatriz + 1

Sheets("Multiplicador de parámetros").Cells(1 + i_organismo, 2 + ColumnaMatriz) = Mercado

ColumnaMatriz = ColumnaMatriz + 1

Sheets("Multiplicador de parámetros").Cells(1 + i_organismo, 2 + ColumnaMatriz) = Tiempo

ColumnaMatriz = ColumnaMatriz + 1

CostoSigma = Sheets("Investigación de producción (2)").Cells(2 + i_renglon, 52).Value

Sheets("CostosMC").Cells(2 + i, ColumnaActual + 5) = CostoSigma

CostoAlibaba = Sheets("Investigación de producción (2)").Cells(2 + i_renglon, 54).Value

Sheets("CostosMC").Cells(2 + i, ColumnaActual + 6) = CostoAlibaba

Loop Until CostoSigma > 0 And CostoAlibaba > 0

Next i

MediaMat = Application.WorksheetFunction.Average(Range("E8:E307"))

Loop Until MediaMat < 1 And MediaMat > -1

ColumnaActual = ColumnaActual + 7

i_renglon = i_renglon + 1

Next i_organismo

End Sub

**Integrated Monte Carlo simulation code (Visual Basic) used to generate 300 random parameter values within their respective variation ranges, iterated through a loop for each PHA methodology with commercial potential**

Sub MC_Integrado()

Dim x As Integer

Dim i As Integer

Dim Desviacion As Double

Dim DSPC As Double

Dim Capital As Double

Dim Mercado As Double

Dim Recovery As Double

Dim ColumnaActual As Integer

Dim Organismo_tabla As String

Dim i_organismo As Integer

Dim i_renglon As Integer

Dim CostoSigma As Double

Dim CostoAlibaba As Double

Dim ColumnaMatriz As Integer

x = Cells(5, 1).Value

ColumnaActual = 1

i_organismo = 1

i_renglon = 1

For i_organismo = 1 To 3

Cells(2, 3).Value = i_organismo

Range("D2").Value = WorksheetFunction.XLookup(Range("C2").Value, Sheets("Inv prod MC (3)").Range("O33:O47"), Sheets("Inv prod MC (3)").Range("Q33:Q47"))

Sheets("CostosMC3").Cells(1, ColumnaActual) = Range("D2").Value

Range("D3").Value = Sheets("Inv prod MC (3)").Cells(32 + i_organismo, 23) * -1

Range("D5").Value = Sheets("Inv prod MC (3)").Cells(32 + i_organismo, 23)

Organismo_tabla = Range("D2").Value

Sheets("CostosMC3").Cells(1, ColumnaActual) = Organismo_tabla

For i = 1 To x

Do

Randomize

Y = Rnd()

Cells(7 + i, 1).Value = Y

If Y <= Cells(6, 4) Then

Desviacion = Cells(3, 4) + (Cells(5, 4) - Cells(3, 4)) * (Y * Cells(6, 4)) ^ (1 / 2)

Else

Desviacion = Cells(3, 4) + (Cells(5, 4) - Cells(3, 4)) * (1 - ((1 - Cells(6, 4)) * (1 - Y)) ^ (1 / 2))

End If

Debug.Print Sheets("Inv prod MC (3)").Cells(32 + i_organismo, 18).Value

Cells(7 + i, 2).Value = Desviacion

Sheets("CostosMC3").Cells(2, ColumnaActual) = "Desviación Estándar"

Sheets("CostosMC3").Cells(2 + i, ColumnaActual).Value = Desviacion

Randomize

Y = Rnd()

Cells(7 + i, 1).Value = Y

Mercado = Cells(3, 13) + (Cells(5, 13) - Cells(3, 13)) * Y

Cells(7 + i, 11).Value = Mercado

Sheets("CostosMC3").Cells(2, ColumnaActual + 3) = "Mercado"

Sheets("CostosMC3").Cells(2 + i, ColumnaActual + 3).Value = Mercado

Randomize

Y = Rnd()

Y2= Rnd()

Cells(7 + i, 1).Value = Y

Mean_Rec = (Cells(5, 16) + Cells(3, 16)) / 2

StdDev_Rec = (Cells(5, 16) - Cells(3, 16)) / 6

Z = Sqr(-2 * Log(Y)) * Cos(2 * WorksheetFunction.Pi() * Y2)

Recovery = Mean_Rec + StdDev_Rec * Z

If Recovery < Cells(3, 16) Then Recovery = Cells(3, 16)

If Recovery > Cells(5, 16) Then Recovery = Cells(5, 16)

Cells(7 + i, 14).Value = Recovery

Sheets("CostosMC3").Cells(2, ColumnaActual + 4) = "Recovery Yield"

Sheets("CostosMC3").Cells(2 + i, ColumnaActual + 4).Value = Recovery

Randomize

Y = Rnd()

Cells(7 + i, 1).Value = Y

DSPC = Cells(3, 7) + (Cells(5,7) - Cells(3, 7))*Y

Cells(7 + i, 5).Value = DSPC

Sheets("CostosMC3").Cells(2, ColumnaActual + 1) = "DSP Cost Contribution"

Sheets("CostosMC3").Cells(2 + i, ColumnaActual + 1) = DSPC

Randomize

Y = Rnd()

Cells(7 + i, 1).Value = Y

Capital = Cells(3, 10) + (Cells(5, 10) - Cells(3, 10)) * Y

Cells(7 + i, 8).Value = Capital

Sheets("CostosMC3").Cells(2, ColumnaActual + 2) = "Capital"

Sheets("CostosMC3").Cells(2 + i, ColumnaActual + 2).Value = Capital

ColumnaMatriz = 1

Sheets("Multiplicador de parámetros (3)").Cells(1 + i_organismo, 2 + ColumnaMatriz) = Desviacion

ColumnaMatriz = ColumnaMatriz + 1

Sheets("Multiplicador de parámetros (3)").Cells(1 + i_organismo, 2 + ColumnaMatriz) = DSPC

ColumnaMatriz = ColumnaMatriz + 1

Sheets("Multiplicador de parámetros (3)").Cells(1 + i_organismo, 2 + ColumnaMatriz) = Capital

ColumnaMatriz = ColumnaMatriz + 1

Sheets("Multiplicador de parámetros (3)").Cells(1 + i_organismo, 2 + ColumnaMatriz) = Mercado

ColumnaMatriz = ColumnaMatriz + 1

Sheets("Multiplicador de parámetros (3)").Cells(1 + i_organismo, 2 + ColumnaMatriz) = Recovery

ColumnaMatriz = ColumnaMatriz + 1

Sheets("Inv prod MC (3)").Cells(14 + i_organismo, 39).GoalSeek Goal:=0, ChangingCell:=Sheets("Inv prod MC (3)").Cells(14 + i_organismo, 36)

Sheets("CostosMC3").Cells(2, ColumnaActual + 5) = " Costo USP & DSP Sigma (USD/kg)"

CostoSigma = Sheets("Inv prod MC (3)").Cells(2 + i_renglon, 53).Value

Sheets("CostosMC3").Cells(2 + i, ColumnaActual + 5).Value = CostoSigma

Sheets("CostosMC3").Cells(2 + i, ColumnaActual + 5).NumberFormat = “0.00000000”

Sheets("CostosMC3").Cells(2, ColumnaActual + 6) = " Costo USP & DSP Alibaba (USD/kg)"

CostoAlibaba = Sheets("Inv prod MC (3)").Cells(2 + i_renglon, 55).Value

Sheets("CostosMC3").Cells(2 + i, ColumnaActual + 6).Value = CostoAlibaba

Sheets("CostosMC3").Cells(2 + i, ColumnaActual + 6).NumberFormat = “0.00000000”

Loop Until CostoSigma > 0 And CostoAlibaba > 0

Next i

ColumnaActual = ColumnaActual + 7

i_renglon = i_renglon + 1

Next i_organismo

End Sub
